# Supplementary material for: A Refined Injury and Modular Dietary Design for Studying Atherogenesis in Rabbits: The Next Level in Deciphering the Interplay of Risk Factors
Source: Research Square preprint supplement (doi:10.21203/rs.3.rs-1358736/v1), 2022-02-22
Supplement: Supplementary file 1 [file 37992ada1d772eecf2e6206b.xlsx]

## Sheet: Tabelle1
S7. Statistical analysis
Fig. 1.
Effects of JURY-controlled vs pressure-monitored denudation on the endothelium under low pressure conditions.
B1 Myographical analysis: relaxion with acetylcholine after precontractioning with norepinephrine.
2 way ANOVA, Bonferroni Posttest
	p-values			adjusted p-values
	Control vs Manual	Control vs JURY	Manual vs JURY	Control vs Manual	Control vs JURY	Manual vs JURY	ANOVA table	F (DFn, DFd)	p-value
Ach log(mol/l)	p-value	p-value	p-value	p-value	p-value	p-value	Concentrations x Injury type	F (16, 384) = 47.94	<0.001
0,000000003	<0.001	<0.001	0.133	0.001	<0.001	0.4	Concentrations	F (1.265, 60.70) = 127.2	<0.001
0,00000001	<0.001	<0.001	0.069	0.002	<0.001	0.208	Injury type	F (2, 48) = 66.44	<0.001
0,00000003	0.008	<0.001	0.135	0.023	<0.001	0.406	Relaxation	F (48, 384) = 9.209	<0.001
0,0000001	<0.001	<0.001	0.01	<0.001	<0.001	0.03
0,0000003	<0.001	<0.001	0.002	<0.001	<0.001	0.006
0,000001	<0.001	<0.001	0.002	<0.001	<0.001	0.005
0,000003	<0.001	<0.001	0.002	<0.001	<0.001	0.005
0,00001	<0.001	<0.001	0.002	<0.001	<0.001	0.006
Comparison treatment means (main treatment effect)
Uncorrected Fisher's LSD	Mean Diff.	95.00% CI of diff.	Significant?	Summary	Individual p-value
Control vs. Manual	-26.38	-33.60 to -19.15	Yes	****	<0.001
Control vs. JURY	-42.89	-48.63 to -37.14	Yes	****	<0.001
Manual vs. JURY	-16.51	-21.00 to -12.02	Yes	****	<0.001
Bonferroni's multiple comparisons test	Mean Diff.	95.00% CI of diff.	Significant?	Summary	Adjusted p-value
Control vs. Manual	-26.38	-35.21 to -17.54	Yes	****	<0.001
Control vs. JURY	-42.89	-49.93 to -35.85	Yes	****	<0.001
Manual vs. JURY	-16.51	-22.02 to -11.01	Yes	****	<0.001
ANOVA table	SS	DF	MS	F (DFn, DFd)	p-value
Concentration x Injury type	88752	16	5547	F (16, 384) = 47.94	<0.001
Concentration	117786	8	14723	F (1.265, 60.70) = 127.2	<0.001
Injury type	141606	2	70803	F (2, 48) = 66.44	<0.001
Relaxation	51149	48	1066	F (48, 384) = 9.209	<0.001
Residual	44434	384	115.7
B2 Myographical analysis: relaxion with sodium nitroprusside after precontractioning with norepinephrine.
2 way ANOVA, Bonferroni Posttest
	p-values			adjusted p-values
	Control vs Manual	Control vs JURY	Manual vs JURY	Control vs Manual	Control vs JURY	Manual vs JURY	ANOVA table	F (DFn, DFd)	p-value
SNP log(mol/l)	p-value	p-value	p-value	p-value	p-value	p-value	Concentrations x Injury type	F (16, 384) = 6.241	<0.001
0,000000003	0.342	0.062	0.408	>0.999	0.187	>0.999	Concentrations	F (1.744, 83.69) = 1277	<0.001
0,00000001	0.01	0.444	0.255	0.029	>0.999	0.766	Injury type	F (2, 48) = 8.753	<0.001
0,00000003	<0.001	0.006	0.303	<0.001	0.018	0.909	Relaxation	F (48, 384) = 4.469	<0.001
0,0000001	<0.001	<0.001	0.593	<0.001	<0.001	>0.999
0,0000003	<0.001	<0.001	0.837	<0.001	<0.001	>0.999
1e-06	<0.001	<0.001	0.971	<0.001	<0.001	>0.999
0,000003	<0.001	<0.001	0.867	<0.001	<0.001	>0.999
0,00001	<0.001	<0.001	0.796	<0.001	<0.001	>0.999
Comparison treatment means (main treatment effect)
Uncorrected Fisher's LSD	Mean Diff.	95.00% CI of diff.	Significant?	Summary	Individual p-value
Control vs. Manual	7.782	-0.7010 to 16.26	No	ns	0.072
Control vs. JURY	5.627	-2.949 to 14.20	No	ns	0.198
Manual vs. JURY	-2.155	-10.85 to 6.541	No	ns	0.626
Bonferroni's multiple comparisons test	Mean Diff.	95.00% CI of diff.	Significant?	Summary	Adjusted p-value
Control vs. Manual	7.782	-2.596 to 18.16	No	ns	0.216
Control vs. JURY	5.627	-4.865 to 16.12	No	ns	0.593
Manual vs. JURY	-2.155	-12.79 to 8.482	No	ns	>0.999
ANOVA table	SS	DF	MS	F (DFn, DFd)	p-value
Concentration x Injury type	6084	16	380.3	F (16, 384) = 6.241	<0.001
Concentration	622384	8	77798	F (1.744, 83.69) = 1277	<0.001
Injury type	4767	2	2383	F (2, 48) = 8.753	<0.001
Relaxation	13069	48	272.3	F (48, 384) = 4.469	<0.001
Residual	23398	384	60.93
Fig.2.
Atherosclerotic plaque development: JURY-controlled injury vs pressure-monitored manual denudation.
A Vessel wall area.
U-Test
Sample 1- sample 2	p-value	Paarwise adjustment
2-3	0.026	0.052
2-4	0.01	0.02
3-5	0.038	0.076
4-5	1	2
6-8	0.016	0.032
7-8	0.151	0.302
B Fractional anisotropy.
U-Test
Sample 1- sample 2	p-value	Paarwise adjustment
2-3	0.065	0.13
2-4	0.476	0.952
3-5	1	2
4-5	0.2	0.4
6-8	0.008	0.016
7-8	0.008	0.016
Fig.3.
Atheroscerotic plaque development in balloon-denuded aortas from rabbits fed different diets.
A Vessel wall area.
Kruskal-Wallis-Test, pairwise comparisons with Bonferonni correction
Sample 1 - sample 2	p-value	p-value adjusted
SD-VCDD	0.157	0.944	H=21,742
SD-HCD	0.011	0.068
SD-VCD/HCD	0	0
VCDD-HCD	0.204	1
VCDD-VCD/HCD	0.002	0.013
HCD-VCD/HCD	0.143	0.855
B Fractional anisotropy.
Kruskal-Wallis-Test, pairwise comparisons with Bonferonni correction
Sample 1 - sample 2	p-value	p-value adjusted
VCD/HCD-HCD	0.059	0.356	H=9,063
VCD/HCD-VCDD	0.018	0.108
VCD/HCD-SD	0.006	0.035
HCD-VCDD	0.819	1
HCD-SD	0.563	1
VCDD-SD	0.697	1
Fig.6
Biomechanical properties and vascular reactivity of aortic sections from rabbits fed different diets.
A Biaxial mechanical properties in terms of Cauchy stress vs. stretch behavior in the circumferential direction, 1.3 strech.
Kruskal-Wallis-Test, pairwise comparisons with Bonferonni correction
Sample 1 - sample 2	p-value	p-value adjusted
SD-HCD	0.807	1	H=13,780
SD-VCDD	0.007	0.042
SD-VCD/HCD	0.006	0.033
HCD-VCDD	0.014	0.083
HCD-VCD/HCD	0.011	0.066
VCDD-VCD/HCD	0.94	1
B Biaxial mechanical properties in terms of Cauchy stress vs. stretch behavior in the longitudinal direction, 1.3 strech
Kruskal-Wallis-Test, pairwise comparisons with Bonferonni correction
Sample 1 - sample 2	p-value	p-value adjusted
SD-HCD	0.625	1	H=8,980
SD-VCD/HCD	0.035	0.208
SD-VCDD	0.012	0.074
HCD-VCD/HCD	0.1	0.603
HCD-VCDD	0.042	0.252
VCD/HCD -VCDD	0.706	1
C Myographical analysis: contraction with KPSS.
1 way ANOVA, Bonferroni Posttest
Sample 1 - sample 2	p-value	p-value adjusted
VCDD-VCD/HCD	<0.001	<0.001	ANOVA table	SS	DF	MS	F (DFn, DFd)	p-value
VCDD-SD	0.508	>0.999	Diet	10891	3	3630	F (3, 76) = 9.059	<0.001
VCDD-HCD	0.49	>0.999	Contraction	30455	76	400.7
VCD/HCD-SD	<0.001	<0.001	Total	41346	79
VCD/HCD-HCD	<0.001	<0.001
SD-HCD	0.978	>0.999
D Myographical analysis: contraction with norepinephrine.
2 way ANOVA, Bonferroni Posttest
	p-values				adjusted p-values
NE log(mol/l)	SD vs VCD/HCD	SD vs HCD	SD vs VCDD	HCD vs VCD/HCD	SD vs VCD/HCD	SD vs HCD	SD vs VCDD	HCD vs VCD/HCD	ANOVA table	SS	DF	MS	F (DFn, DFd)	p-value
0,000000001	0.821	0.148	0.085	0.272	>0.999	0.886	0.509	>0.999	Concentration x Diet	35116	24	1463	F (24, 608) = 4.836	<0.001
0,000000003	0.516	0.517	0.005	0.878	>0.999	>0.999	0.033	>0.999	Concentration	2035156	8	254395	F (1.655, 125.8) = 840.8	<0.001
0,00000001	0.016	0.3	0.002	0.024	0.094	>0.999	0.011	0.145	Diet	53507	3	17836	F (3, 76) = 13.46	<0.001
0,00000003	<0.001	0.117	0.002	<0.001	<0.001	0.702	0.012	0.145	Contraction	100738	76	1325	F (76, 608) = 4.381	<0.001
0,0000001	<0.001	0.042	<0.001	0.002	<0.001	0.254	0.002	0.012	Residual	183956	608	302.6
0,0000003	<0.001	0.032	0.013	0.028	<0.001	0.192	0.078	0.168
0,000001	0.018	0.081	0.115	0.599	0.11	0.488	0.693	>0.999
0,000003	0.18	0.073	0.862	0.807	>0.999	0.437	>0.999	>0.999
0,00001	0.922	0.338	0.915	0.448	>0.999	>0.999	>0.999	>0.999
Comparison diet means (main diet effect)
Uncorrected Fisher's LSD+A174	Mean Diff.	95.00% CI of diff.	Significant?	Summary	Individual p-value	ANOVA table	SS	DF	MS	F (DFn, DFd)	p-value
VCDD vs. VCD/HCD	22.74	10.64 to 34.83	Yes	***	<0.001	Concentration x Diet	35116	24	1463	F (24, 608) = 4.836	<0.001
VCDD vs. SD	9.833	-2.373 to 22.04	No	ns	0.114	Concentration	2035156	8	254395	F (1.655, 125.8) = 840.8	<0.001
VCDD vs. HCD	17.9	6.158 to 29.63	Yes	**	0.003	Diet	53507	3	17836	F (3, 76) = 13.46	<0.001
VCD/HCD vs. SD	-12.91	-24.94 to -0.8684	Yes	*	0.036	Contraction	100738	76	1325	F (76, 608) = 4.381	<0.001
VCD/HCD vs. HCD	-4.843	-16.41 to 6.720	No	ns	0.411	Residual	183956	608	302.6
SD vs. HCD	8.063	-3.616 to 19.74	No	ns	0.175
Bonferroni's multiple comparisons test	Mean Diff.	95.00% CI of diff.	Significant?	Summary	Adjusted p-value
VCDD vs. VCD/HCD	22.74	6.423 to 39.06	Yes	**	0.002
VCDD vs. SD	9.833	-6.632 to 26.30	No	ns	0.684
VCDD vs. HCD	17.9	2.061 to 33.73	Yes	*	0.017
VCD/HCD vs. SD	-12.91	-29.15 to 3.333	No	ns	0.214
VCD/HCD vs. HCD	-4.843	-20.44 to 10.76	No	ns	>0.999
SD vs. HCD	8.063	-7.693 to 23.82	No	ns	>0.999
E Myographical analysis: relaxatio with acetylcholine.
2 way ANOVA, Bonferroni Posttest
	p-values				adjusted p-values
Ach log(mol/l)	SD vs VCD/HCD	SD vs HCD	SD vs VCDD	HCD vs VCD/HCD	SD vs VCD/HCD	SD vs HCD	SD vs VCDD	HCD vs VCD/HCD	ANOVA table	SS	DF	MS	F (DFn, DFd)	p-value
0,000000001									Concentration x Diet	8534	24	355.6	F (24, 608) = 2.282	<0.001
0,000000003	<0.001	<0.001	0.287	0.028	<0.001	0.001	>0.999	0.167	Concentration	150001	8	18750	F (1.246, 94.71) = 120.3	<0.001
0,00000001	<0.001	<0.001	0.116	0.451	<0.001	0.002	0.694	>0.999	Diet	18672	3	6224	F (3, 76) = 3.465	<0.001
0,00000003	0.002	0.008	0.041	0.372	0.014	0.05	0.243	>0.999	Relaxation	136520	76	1796	F (76, 608) = 11.53	<0.001
0,0000001	0.007	0.058	0.046	0.241	0.041	0.35	0.275	>0.999	Residual	94730	608	155.8
0,0000003	0.006	0.239	0.076	0.069	0.033	>0.999	0.457	0.415
0,000001	0.007	0.441	0.106	0.041	0.043	>0.999	0.636	0.248
0,000003	0.009	0.42	0.096	0.058	0.056	>0.999	0.578	0.349
0,00001	0.014	0.487	0.14	0.056	0.081	>0.999	0.838	0.336
Comparision diet means (main diet effect)
Uncorrected Fisher's LSD	Mean Diff.	95.00% CI of diff.	Significant?	Summary	Individual P Value	ANOVA table	SS	DF	MS	F (DFn, DFd)	p-value
VCDD vs. VCD/HCD	5.07	0.9165 to 9.224	Yes	*	0.017	Concentration x Diet	8534	24	355.6	F (24, 608) = 2.282	<0.001
VCDD vs. SD	-9.076	-14.29 to -3.864	Yes	***	<0.001	Concentration	150001	8	18750	F (1.246, 94.71) = 120.3	<0.001
VCDD vs. HCD	-2.491	-7.334 to 2.353	No	ns	0.313	Diet	18672	3	6224	F (3, 76) = 3.465	0.020
VCD/HCD vs. SD	-14.15	-18.98 to -9.313	Yes	****	<0.001	Relaxation	136520	76	1796	F (76, 608) = 11.53	<0.001
VCD/HCD vs. HCD	-7.561	-11.99 to -3.128	Yes	***	<0.001	Residual	94730	608	155.8
SD vs. HCD	6.586	1.150 to 12.02	Yes	*	0.018
Bonferroni's multiple comparisons test	Mean Diff.	95.00% CI of diff.	Significant?	Summary	Adjusted P Value
VCDD vs. VCD/HCD	5.07	-0.5338 to 10.67	No	ns	0.101
VCDD vs. SD	-9.076	-16.11 to -2.045	Yes	**	0.004
VCDD vs. HCD	-2.491	-9.025 to 4.044	No	ns	>0.999
VCD/HCD vs. SD	-14.15	-20.67 to -7.624	Yes	****	<0.001
VCD/HCD vs. HCD	-7.561	-13.54 to -1.579	Yes	**	0.005
SD vs. HCD	6.586	-0.7472 to 13.92	No	ns	0.106
F Myographical analysis: relaxation with sodium nitroprusside.
2 way ANOVA, Bonferroni Posttest
	p-values				adjusted p-values
SNP log(mol/l)	SD vs VCD/HCD	SD vs HCD	SD vs VCDD	HCD vs VCD/HCD	SD vs VCD/HCD	SD vs HCD	SD vs VCDD	HCD vs VCD/HCD	ANOVA table	SS	DF	MS	F (DFn, DFd)	p-value
0,000000001	0.078	<0.001	0.313	0.436	0.471	0.005	>0.999	>0.999	Concentration x Diet	11135	24	464	F (24, 592) = 4.635	<0.001
0,000000003	0.011	0.027	0.758	0.48	0.068	0.16	>0.999	>0.999	Concentration	983059	8	122882	F (1.791, 132.5) = 1228	<0.001
0,00000001	0.011	0.021	0.59	0.619	0.066	0.128	>0.999	>0.999	Diet	7421	3	2474	F (3, 74) = 3.172	0.029
0,00000003	0.032	0.129	0.354	0.39	0.192	0.776	>0.999	>0.999	Relaxation	57699	74	779.7	F (74, 592) = 7.789	<0.001
0,0000001	0.094	0.344	0.126	0.408	0.564	>0.999	0.758	>0.999	Residual	59261	592	100.1
0,0000003	0.382	0.818	0.051	0.514	>0.999	>0.999	0.305	>0.999
0,000001	0.135	0.596	0.028	0.303	0.811	>0.999	0.166	>0.999
0,000003	0.008	0.177	0.03	0.035	0.045	>0.999	0.178	0.209
0,00001	<0.001	0.027	0.025	0.033	0.005	0.164	0.153	0.198
Comparison diet means (main diet effect)
Uncorrected Fisher's LSD	Mean Diff.	95.00% CI of diff.	Significant?	Summary	Individual P Value	ANOVA table	SS	DF	MS	F (DFn, DFd)	p-value
VCDD vs. VCD/HCD	8.46	-0.2275 to 17.15	No	ns	0.056	Concentration x Diet	11135	24	464	F (24, 592) = 4.635	<0.001
VCDD vs. SD	3.971	-4.120 to 12.06	No	ns	0.335	Concentration	983059	8	122882	F (1.791, 132.5) = 1228	<0.001
VCDD vs. HCD	7.393	-1.034 to 15.82	No	ns	0.085	Diet	7421	3	2474	F (3, 74) = 3.172	0.029
VCD/HCD vs. SD	-4.488	-12.83 to 3.853	No	ns	0.291	Relaxation	57699	74	779.7	F (74, 592) = 7.789	<0.001
VCD/HCD vs. HCD	-1.067	-9.734 to 7.601	No	ns	0.809	Residual	59261	592	100.1
SD vs. HCD	3.422	-4.648 to 11.49	No	ns	0.405
Bonferroni's multiple comparisons test	Mean Diff.	95.00% CI of diff.	Significant?	Summary	Adjusted P Value
VCDD vs. VCD/HCD	8.46	-3.261 to 20.18	No	ns	0.338
VCDD vs. SD	3.971	-6.945 to 14.89	No	ns	>0.999
VCDD vs. HCD	7.393	-3.977 to 18.76	No	ns	0.512
VCD/HCD vs. SD	-4.488	-15.74 to 6.765	No	ns	>0.999
VCD/HCD vs. HCD	-1.067	-12.76 to 10.63	No	ns	>0.999
SD vs. HCD	3.422	-7.465 to 14.31	No	ns	>0.999
Fig. S3
Changes of plasma Hcy, cholesterol and triglyceride levels in rabbits fed different diets.
A Change of plasma Hcy levels.
Kruskal-Wallis-Test, pairwise comparisons with Bonferonni correction
H=3,640
p-value (two-sided test) = 0,303
B Changes of plasma cholesterol levels.
Kruskal-Wallis-Test, pairwise comparisons with Bonferonni correction
Sample 1 - sample 2	p-value	p-value adjusted
SD-VCDD	0.476	1	H=26,011
SD-HCD	0	0.001
SD-VCD/HCD	0	0
VCDD-HCD	0.002	0.01
VCDD-VCD/HCD	0.001	0.006
HCD-VCD/HCD	0.962	1
C Change of plasma triglceride levels.
Kruskal-Wallis-Test, pairwise comparisons with Bonferonni correction
H=4,342
p-value (two-sided test) = 0,227
Fig. S4
Average diet consumption and weight change in rabbits fed different diets.
A Average diet intake.
Kruskal-Wallis-Test, pairwise comparisons with Bonferonni correction
Sample 1 - sample 2	p-value	p-value adjusted
VCD/HCD-HCD	0.149	0.893	H=23,451
VCD/HCD-VCDD	0	0.002
VCD/HCD-SD	0	0
HCD-VCDD	0.046	0.278
HCD-SD	0.005	0.031
VCDD-SD	0.365	1
B Average weight gain.
Kruskal-Wallis-Test, pairwise comparisons with Bonferonni correction
Sample 1 - sample 2	p-value	p-value adjusted
HCD-VCD/HCD	0.209	1	H=24,287
HCD-SD	0.006	0.034
HCD-VCDD	0	0
VCD/HCD-SD	0.111	0.665
VCD/HCD-VCDD	0.001	0.004
SD-VCDD	0.091	0.546
C Weight gain per diet intake.
Kruskal-Wallis-Test, pairwise comparisons with Bonferonni correction
Sample 1 - sample 2	p-value	p-value adjusted
HCD-VCD/HCD	0.277	1	H=24,096
HCD-SD	0.01	0.058
HCD-VCDD	0	0
VCD/HCD-SD	0.116	0.694
VCD/HCD-VCDD	0	0.002
SD-VCDD	0.067	0.403
